# Supplementary material for: Insights into cargo sorting by SNX32 and its role in neurite outgrowth
Source: eLife journal article supplement (doi:10.7554/elife.84396), 2023-05-09

## Extended data 1

Colocalization of SNX32 with TGN46 and GM130: A) Super resolution image showing colocalization of GFP-SNX32 and GM130, Scale bar 10 $\mu$ m, inset 1 $\mu$ m (magnified regions are shown as insets). B) Quantifications showing Pearson correlation coefficient co-localization of GFP-SNX32 with TGN46, GM130 in HeLa cells, data represent mean  $\pm$ SEM (N=3, n $\geq$ 60 cells per independent experiments). C) Quantifications showing co-localization of GFP-SNX32 with TGN46, GM130 in HeLa cells calculated using automated image analysis software Motion Tracking<sup>23,24</sup>, data represent mean  $\pm$ SEM (N=3, n $\geq$ 60 cells per independent experiments)

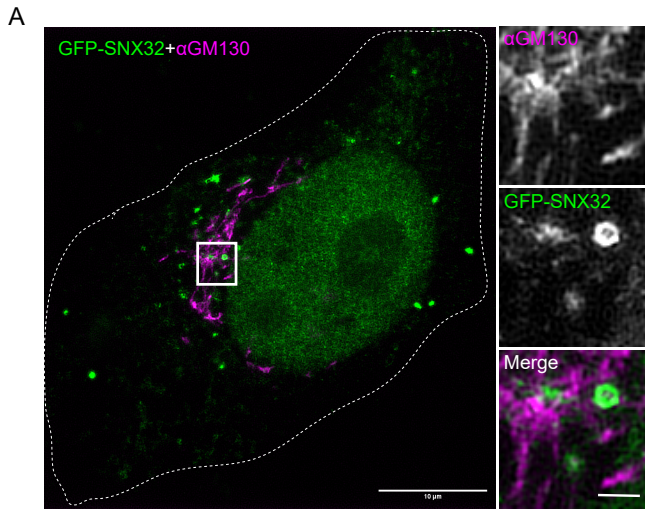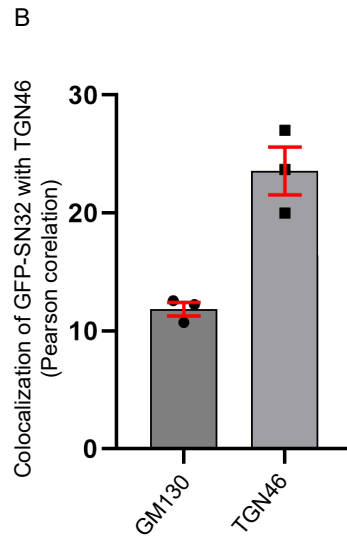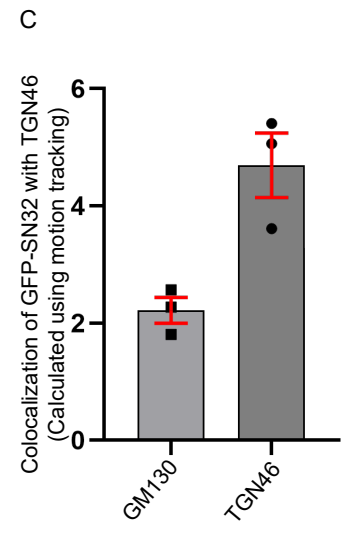

Supplement: data1 [file elife-84396-data1-v2.pdf]
