# Supplementary material for: Insights into cargo sorting by SNX32 and its role in neurite outgrowth
Source: eLife journal article supplement (doi:10.7554/elife.84396), 2023-05-09
Supplement: fig5-data5 [file SNX1.pdf › Figure5-source data 5/SNX1.pdf]

## Acquisition Information

| # | Image ID   | Acquire Time         | Channels | Resolution | Intensities | Quality | Analysis | Image Name | Comment     |
|---|------------|----------------------|----------|------------|-------------|---------|----------|------------|-------------|
| 1 | 0000012_01 | 09-Nov-2018 12:02:40 | 700 800  | 169um      | Auto Auto   | lowest  | Manual   | 0000012_01 | 09_11_18 IP |

## Image Display Values

| Channel | Color                       | Minimum | Maximum | K |
|---------|-----------------------------|---------|---------|---|
| 800     | Gray Scale (Black on White) | 0.321   | 50.6    | 0 |

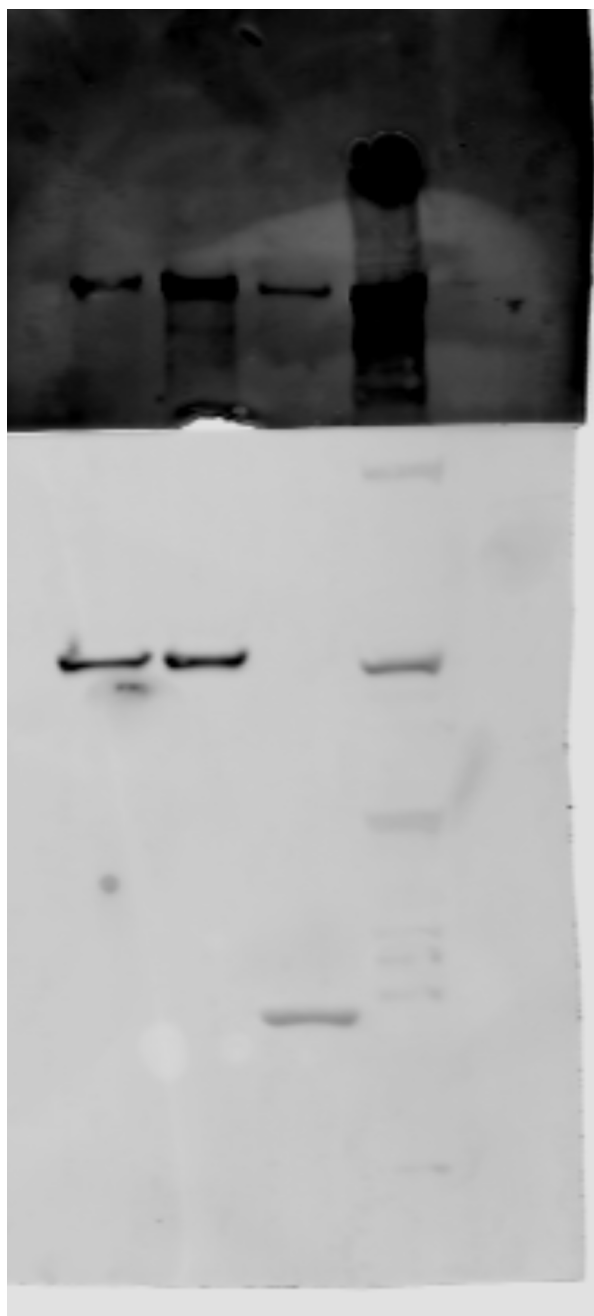

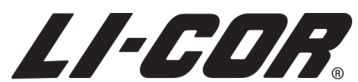

Image ID: 0000012\_01  
Acquire Time: 09-Nov-2018 12:02:40

Page 2

Acquisition Information (continued)

| # | Image Modifications |
|---|---------------------|
| 1 |                     |
