# Supplementary material for: Insights into cargo sorting by SNX32 and its role in neurite outgrowth
Source: eLife. 2023 May 9;12:e84396. doi: 10.7554/eLife.84396 (PMC10219652; doi:10.7554/eLife.84396)
Supplement: Supplementary file 1. — Sheet 1: the primer sequences used to carry out RT PCR, Sheet 2: the sequence details of the shRNA clones used in the study, Sheet 3: the siRNA sequences and product details. [file elife-84396-supp1.xlsx]

## Sheet: RT Primer sequences
RT Primer sequences
Gene Name	Forward Primer	Reverse Primer
SNX32	TATCACACCCGTATCCGAGA	AGGAAGCTCGTCCTTAGCTG
SNX1	GGTTTGAGGAGAAGCTCCAG	GCGCTAGCTCTTTCCTATGG
SNX4	CAGCTGAAGGCAGACTCCA	AGATCTGAGTCCGGACTTGTA
SNX6	ATATCATTCCACCAGCACCA	TGCCAAATATTCAGCTTCCA
Rab11	GCA AGA GCT TTT GCA GAA AAG AAT GGT TTG	CAATGCGGTAAATCTCTGTTAAAATTGTCTG
BSG	GCTGCCGGCACAGTCTTCA	CGGAGTCCACCTTGAACTCCGTTTTC

## Sheet: shRNA clone sequences
shRNA clone sequences
TRCN0000181072	Clone 4	CCGGCTTTGAGCATGAGAGGACCTTCTCGAGAAGGTCCTCTCATGCTCAAAGTTTTTTG	SNX32
TRCN0000180862	Clone 6	CCGGGTTGGAGTATCACACCCGTATCTCGAGATACGGGTGTGATACTCCAACTTTTTTG	SNX32
TRCN0000148010	Clone 7	CCGGGACAAGGTGAAATTCACTGTTCTCGAGAACAGTGAATTTCACCTTGTCTTTTTTG	SNX32
TRCN0000147674	Clone 8	CCGGGCCATCTTTAAGAAGACAGTTCTCGAGAACTGTCTTCTTAAAGATGGCTTTTTTG	SNX32
TRCN0000006732	Clone 6	CCGGCCCATCATACACTTCCTTCTTCTCGAGAAGAAGGAAGTGTATGATGGGTTTTT	BSG
TRCN0000006733	Clone 7	CCGGGCTACACATTGAGAACCTGAACTCGAGTTCAGGTTCTCAATGTGTAGCTTTTT	BSG
TRCN0000006734	Clone 8	CCGGCCAGAATGACAAAGGCAAGAACTCGAGTTCTTGCCTTTGTCATTCTGGTTTTT	BSG
TRCN0000006735	Clone 9	CCGGACAGTCTTCACTACCGTAGAACTCGAGTTCTACGGTAGTGAAGACTGTTTTTT	BSG
TRCN0000006736	Clone 10	CCGGGAAGTCGTCAGAACACATCAACTCGAGTTGATGTGTTCTGACGACTTCTTTTT	BSG

## Sheet: siRNA clone sequences
siRNA Sequences
Gene Name		siRNA sequence
SNX1(L-017518-00)	1	GAAAAGAAGUGAUACGGUU
	2	GGAAAGAGCUAGCGCUGAA
	3	GAAAGGGACUUCGAGAGGA
	4	CAAAGGCCAUCUCCUAAUG
SNX6(L-017557-01-0005)	1	CGAAACUUCCCAACAAUUA
	2	GAUGAAGACCUCAAACUUU
	3	AAACAUGGUUAAAUCAGCA
	4	AGUAAUCGUUUCAGGAGUA
SNX32(L-017082-01-0005)	1	GGUGGAGAUUUCUGACGCA
	2	UUGUGGAAGUCCGCGGAUGA
	3	ACUUUGAGGCUUCGAGGGA
	4	GUACUACAUGCGUGACUCA
SNX4 (L-011520-00-0005)	1	UUACUGACCUUAAGCACUA
	2	GCGGCGAUAUAGUGAAUUU
	3	GCGACGGAUUGGUUUAGAAA
	4	GUAAUCCUGUGAAUUGAAU
Scramble (D-001810-10-20) (Non-Targeting pool)	1	UGGUUUACAUGUCGACUAA
	2	UGGUUUACAUGUUGUGUGA
	3	UGGUUUACAUGUUUUCUGA
	4	UGGUUUACAUGUUUUAAUA
Rab11a(L-004726-00)	1	GCAACAAUGUGGUUCCUAU
	2	CAAGAGCGAUAUCGAGCUA
	3	GUGCAGUGCUGUCAGAACA
	4	GAGAUUUACCGCAUUGUUU
Rab11b(L-004727-00)	1	UAACGUAGAGGAAGCAUUC
	2	GAGUACGACUACCUAUUCA
	3	UCGCCAAGCACCUGACCUA
	4	CAACUUGUCCUUCAUCGAG
